# Supplementary material
Source: HighWire-hosted journal article supplement (https://cancerpreventionresearch.aacrjournals.org/content/suppl/2012/07/20/1940-6207.CAPR-12-0008)

# Supplementary Figure 1

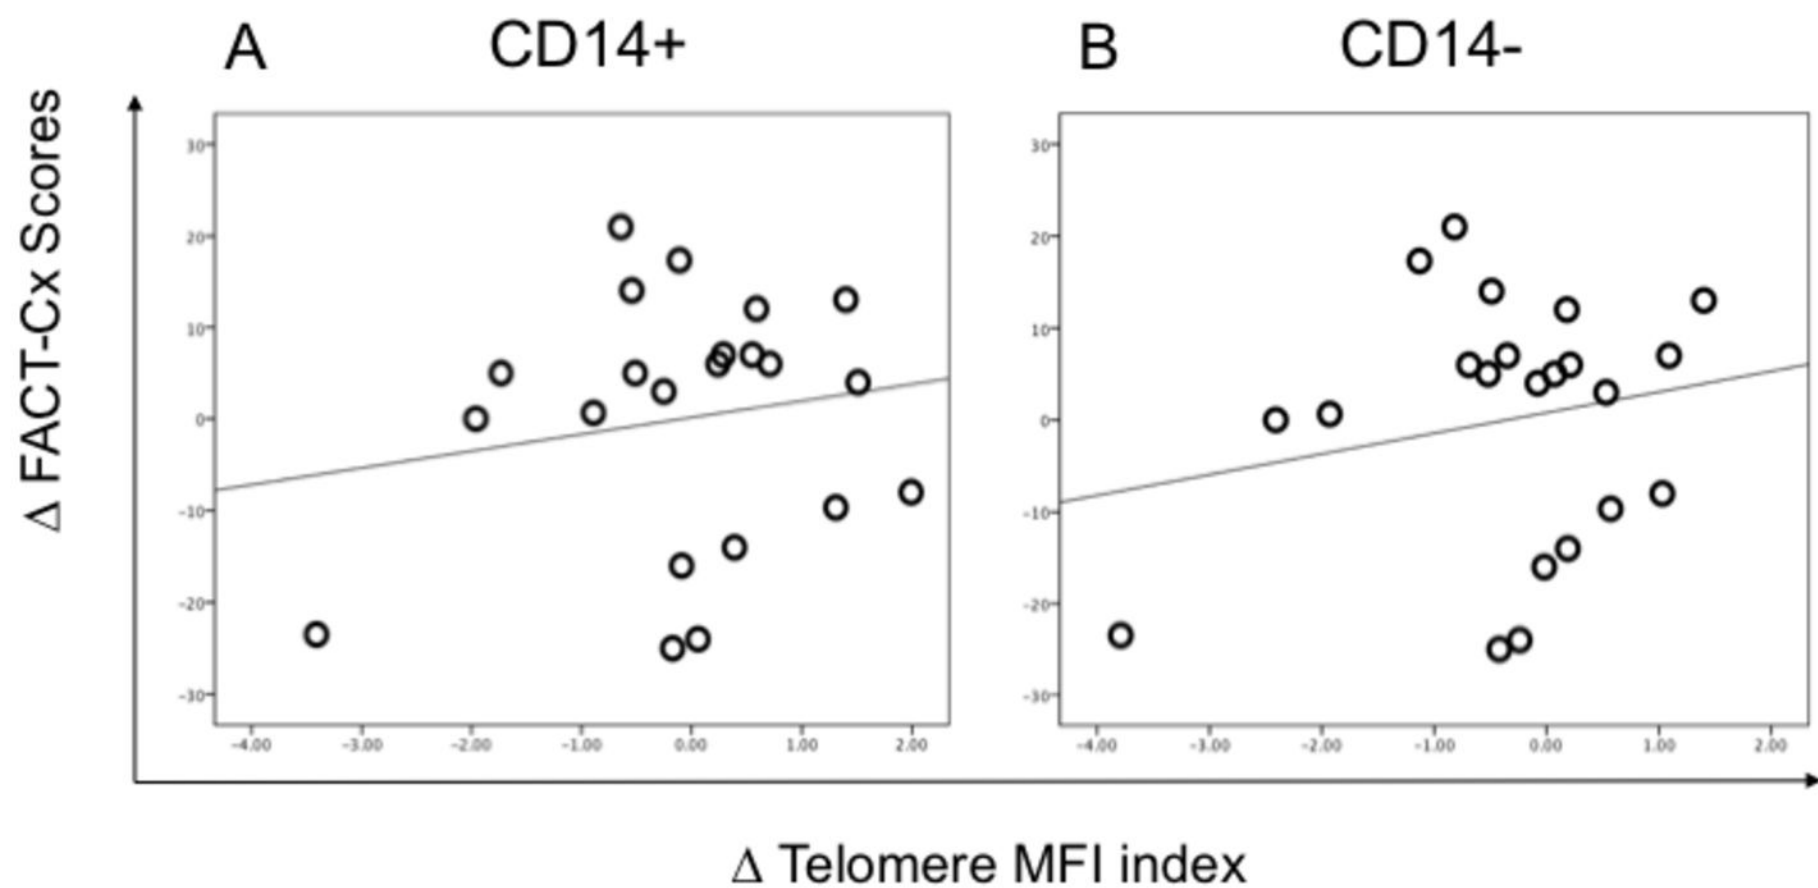

Supplement: fig1.pdf [file fig1.pdf]
